# Supplementary material for: Genomics Assisted Ancestry Deconvolution in Grape
Source: PLOS journal article supplement (doi:10.1371/journal.pone.0080791), 2013-11-11

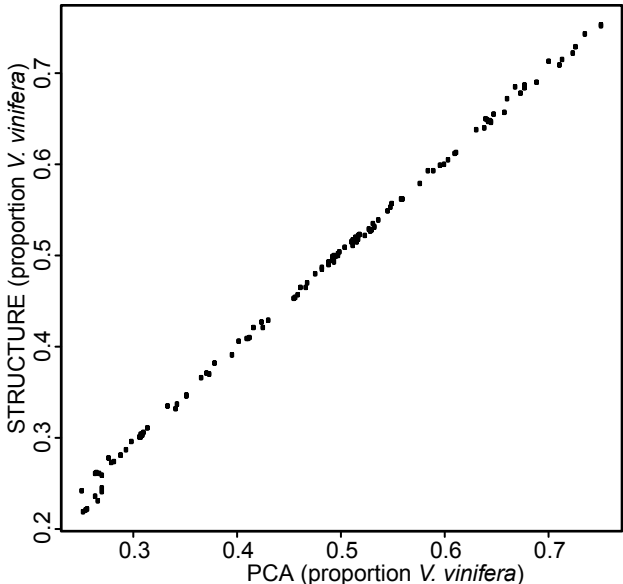

Supplement: S2 (10.1371/journal.pone.0080791.s002) [file journal.pone.0080791.s002]
