# Supplementary material for: Genomics Assisted Ancestry Deconvolution in Grape
Source: PLoS One. 2013 Nov 11;8(11):e80791. doi: 10.1371/journal.pone.0080791 (PMC3823699; doi:10.1371/journal.pone.0080791)
Supplement: Table S2 — A list of the AIMs identified in the present study. The top 100 AIMs are listed for each of the four measures used in the present study. The AIMs are ranked according to the measure listed at the top of each column. The name of each SNP contains the physical coordinates of the SNP according to the 8x Pinot Noir reference genome, where the chromosome name is separated by the physical position by a colon. Chromosome numbers outside of the range of 1-19 refer to the unanchored contigs found in the 8x Pinot Noir reference genome. (XLS) [file pone.0080791.s006.xls]

## Sheet: supptable1
Rank	FST	PC1 Absolute Weight	PC1 Positive Weight	Linear Model
1	2:141291	2:141291	15:7577453	4:1783623
2	5:21669686	6:3792284	1:13794046	1:2619751
3	6:3792284	7:4934118	1:2622531	3858:755890
4	7:4934118	14:19163590	7:13094346	4:2322806
5	12:9066350	15:7577453	13:10692443	15:6401787
6	14:19163590	16:6890855	18:11239810	1:366545
7	17:5140114	1:13794046	12:9066350	4:3763620
8	15:7577453	3860:2941213	7:2151751	4:2322779
9	16:6890855	1:2622531	13:10692442	7:13094346
10	7:2151751	7:13094346	18:11788433	12:1363731
11	7:13094346	13:10692443	1:7802183	11:2312261
12	1:13794046	18:11239810	8:18515027	5:20822461
13	13:10692443	12:9066350	12:1363731	5:21669686
14	18:11239810	7:2151751	5:133260	10:643669
15	3858:755890	13:10692442	19:1245768	13:1778602
16	8:18515027	18:11788433	7:1898848	17:9185022
17	3860:2941213	1:7802183	6:664571	13:2653439
18	13:10692442	3:5354193	17:5140114	4:5205328
19	1:2622531	3858:755890	17:3740979	4:5205336
20	18:11788433	8:18515027	4:2322806	8:19931676
21	1:7802183	1:14526073	11:3842444	7:13984078
22	3:5354193	12:1363731	2:5546719	8:19164005
23	12:1363731	5:21669686	5:20111846	19:48390
24	14:561355	3864:1766072	5:21728007	5:17037585
25	19:1245768	14:561355	14:11321597	15:6181731
26	3:3772919	5:133260	14:717049	9:678759
27	1:14526073	19:1245768	4:13333712	5:4661133
28	14:561356	14:561356	1:7667975	8:18515027
29	4:19278660	4:19278657	6:5350487	15:7577453
30	3864:1766072	7:1898848	17:13881	1:6577130
31	4:19278657	17:7429913	9:10425035	1:4402635
32	17:7429913	4:19278660	7:7180291	9:3394641
33	7:1898848	8:10679565	17:4478453	12:6506582
34	5:133260	6:664571	2:1059092	12:2314340
35	6:16862053	3:3772919	17:9087066	12:2314313
36	6:664571	17:5140114	4:19226186	5:20806305
37	17:13992	17:3740979	4:3763620	5:21728007
38	5:22798649	4:2322806	3850:2913814	1:2619760
39	5:21728007	18:1226553	6:16672304	1:6609058
40	8:10679565	11:3842444	6:16862053	19:2460096
41	4:2322806	5:3864908	8:13700787	7:1898848
42	17:3740979	5:3864833	3:1434899	5:21002705
43	7:4627189	2:5546719	13:2653439	9:15546926
44	18:1226553	5:20111846	7:10693037	1:960128
45	6:16672304	7:4627189	13:1551073	5:3864833
46	3861:2904660	4:1783623	15:6181731	6:214423
47	2:5546719	5:21728007	14:18790751	6:5350487
48	5:3864908	14:11321597	12:18461120	6:664571
49	5:20111846	5:22798649	7:1667778	5:3864908
50	5:3864833	3861:2904660	3:1409233	7:3124287
51	11:3842444	14:717049	17:6018575	16:6890855
52	11:2170516	1:14526353	5:4829662	11:954150
53	4:1783623	6:20768367	9:2617627	6:804458
54	14:11321597	6:7391824	18:152927	18:12623855
55	14:717049	19:13205401	18:1280003	6:2797680
56	6:20768367	16:108498	1:366545	19:1245768
57	19:13205401	6:20768355	5:17037585	18:7801150
58	1:14526353	3:1013821	12:17973652	4:7094602
59	17:6149926	17:6645289	7:3124287	5:3404641
60	6:7391824	17:7157963	19:6602925	9:4807390
61	16:108498	6:3675021	2:17384063	13:5989356
62	17:6645289	4:1228865	14:9871232	12:2314262
63	3:1013821	4:13333712	17:1373655	19:305125
64	6:20768355	5:6157321	9:6489555	15:5865310
65	6:15916489	1:7667975	19:305125	9:6489555
66	4:13333712	9:4934873	3:3436524	6:16672304
67	17:7157963	6:5350487	8:8693377	1:4154869
68	2:2336810	17:13881	14:12442991	13:6989040
69	3862:1396759	7:7180291	5:20822461	11:954243
70	10:643669	9:10425035	3:1521643	13:10692443
71	18:1226162	3859:3075643	5:6678558	5:18002243
72	4:11618949	6:6045443	2:2057306	16:7228842
73	1:4154869	2:2391182	6:804458	14:717049
74	6:3675021	17:4478453	7:13901320	1:15368583
75	3859:3075643	4:2322779	2:2057255	17:8811102
76	6:5350487	2:1059092	1:8974759	5:4466326
77	5:6157321	3862:1396759	13:15098620	9:3252966
78	17:13881	17:9087066	11:7424642	1:7802183
79	7:7180291	18:1226162	14:1571132	4:1185523
80	4:1228865	15:5082017	8:18221627	18:596586
81	9:4934873	4:19226186	8:18221623	13:359456
82	15:6401787	5:20806305	2:3655671	1:2622531
83	17:9087066	3850:2913814	4:15175943	6:2794950
84	9:10425035	4:3763620	16:7157916	18:148579
85	1:7667975	6:16672304	8:15537913	13:184462
86	1:366545	1:4154869	11:630969	19:6602925
87	2:1059092	11:2170516	6:214423	15:499416
88	13:1551073	2:2336810	2:4412982	13:10692442
89	3850:2913814	10:643669	5:6685568	12:6009737
90	17:4478453	6:16862053	4:1185523	3864:1766072
91	6:6045443	5:12161644	7:7179779	1:1709404
92	2:2391182	14:4173981	5:299722	7:13518424
93	4:2322779	8:13700787	17:6230861	18:9540738
94	4:3763620	3:1434899	18:3490918	3:1013821
95	4:19226186	13:2653439	5:5423758	6:18163408
96	5:20806305	7:10693037	2:5854759	13:7156955
97	14:4173981	13:1551073	8:15853918	4:1228865
98	7:10693037	15:6181731	18:8762900	6:4228995
99	15:5082017	18:3611276	6:18163408	11:4774143
100	7:1667778	14:18790751	3:5564543	18:1226162
